# Supplementary material for: The Relationships between Water Intake and Hydration Biomarkers and the Applications for Assessing Adequate Total Water Intake among Young Adults in Hebei, China
Source: MDPI journal article supplement (doi:10.3390/nu13113805), 2021-10-26
Supplement: s1 [file s1]

**Supplementary Table S1** The characteristics of young adults

|                          | Male       | Female     | Total      | <i>P</i> |
|--------------------------|------------|------------|------------|----------|
| Age (y)                  | 19.9±1.0   | 19.8±1.1   | 19.8±1.1   | 0.363    |
| Height (cm)              | 172.0±5.5  | 160.1±6.1  | 166.2±8.3  | <0.001   |
| Weight (kg)              | 67.5±11.9  | 54.8±6.6   | 61.3±11.5  | <0.001   |
| BMI (kg/m <sup>2</sup> ) | 22.8±3.9   | 21.4±2.2   | 22.1±3.3   | <0.001   |
| Hydration status         |            |            |            |          |
| Optimal hydration        | 19 (23.8%) | 39 (51.3%) | 58 (37.1%) | 0.002*   |
| Middle hydration         | 44 (55.0%) | 28 (36.8%) | 72 (46.2%) |          |
| Dehydration              | 17 (21.3%) | 9 (11.8%)  | 26 (16.7%) |          |

Note: \*, ( $\chi^2=12.820$ )

**Supplementary Table 2** The temperature and humidity during the study

|           | Indoors          |              | Outdoors         |              |
|-----------|------------------|--------------|------------------|--------------|
|           | Temperature (°C) | Humidity (%) | Temperature (°C) | Humidity (%) |
| Sunday    | 19.9             | 43           | 18.1             | 37           |
| Monday    | 23.0             | 48           | 22.4             | 41           |
| Tuesday   | 23.3             | 31           | 24.0             | 29           |
| Wednesday | 21.5             | 48           | 17.9             | 42           |
| Thursday  | 21.5             | 40           | 21.0             | 36           |
| Friday    | 22.2             | 35           | 19.2             | 35           |
| Saturday  | 21.2             | 34           | 22.6             | 31           |

**Supplementary Table 3** Correlations between fluids intake and urinary biomarkers of young adults

| Urine biomarkers     | Males                 |          |                 |          |               |          | Females               |          |                 |          |               |          |
|----------------------|-----------------------|----------|-----------------|----------|---------------|----------|-----------------------|----------|-----------------|----------|---------------|----------|
|                      | Total drinking fluids |          | Water from food |          | TWI           |          | Total drinking fluids |          | Water from food |          | TWI           |          |
|                      | <i>r</i>              | <i>p</i> | <i>r</i>        | <i>p</i> | <i>r</i>      | <i>p</i> | <i>r</i>              | <i>p</i> | <i>r</i>        | <i>p</i> | <i>r</i>      | <i>p</i> |
| 24h Volume (mL)      | <b>0.743</b>          | <0.001   | <b>0.412</b>    | <0.001   | <b>0.737</b>  | <0.001   | <b>0.832</b>          | <0.001   | <b>0.493</b>    | <0.001   | <b>0.880</b>  | <0.001   |
| Osmolality (mOsm/kg) | <b>-0.600</b>         | <0.001   | -0.158          | 0.162    | <b>-0.514</b> | <0.001   | <b>-0.822</b>         | <0.001   | <b>-0.348</b>   | 0.002    | <b>-0.799</b> | <0.001   |
| USG                  | <b>-0.432</b>         | <0.001   | -0.191          | 0.090    | <b>-0.425</b> | <0.001   | <b>-0.683</b>         | <0.001   | <b>-0.472</b>   | <0.001   | <b>-0.738</b> | <0.001   |
| pH                   | 0.020                 | 0.857    | 0.191           | 0.089    | 0.110         | 0.331    | -0.072                | 0.534    | <b>0.267</b>    | 0.020    | 0.063         | 0.587    |
| Potassium (mmol/L)   | <b>-0.384</b>         | <0.001   | -0.052          | 0.648    | <b>-0.312</b> | 0.005    | <b>-0.652</b>         | 0.001    | <b>-0.287</b>   | 0.012    | <b>-0.641</b> | <0.001   |
| Sodium (mmol/L)      | <b>-0.222</b>         | <0.001   | <b>0.254</b>    | 0.023    | -0.034        | 0.762    | <b>-0.719</b>         | <0.001   | -0.201          | 0.082    | <b>-0.661</b> | <0.001   |
| Chloride (mmol/L)    | <b>-0.233</b>         | <0.001   | <b>0.287</b>    | 0.010    | -0.030        | 0.795    | <b>-0.695</b>         | <0.001   | -0.181          | 0.117    | <b>-0.638</b> | <0.001   |
| Calcium (mmol/L)     | <b>-0.315</b>         | <0.001   | <b>-0.251</b>   | 0.025    | <b>-0.380</b> | 0.001    | <b>-0.444</b>         | <0.001   | <b>-0.268</b>   | 0.019    | <b>-0.452</b> | <0.001   |
| Phosphorus (mmol/L)  | <b>-0.441</b>         | <0.001   | <b>-0.341</b>   | 0.002    | <b>-0.508</b> | <0.001   | <b>-0.702</b>         | <0.001   | <b>-0.526</b>   | <0.001   | <b>-0.780</b> | <0.001   |
| Magnesium (mmol/L)   | <b>-0.378</b>         | <0.001   | <b>-0.206</b>   | 0.067    | <b>-0.389</b> | <0.001   | <b>-0.629</b>         | <0.001   | <b>-0.384</b>   | 0.001    | <b>-0.667</b> | <0.001   |
| Urea (mmol/L)        | <b>-0.422</b>         | <0.001   | <b>-0.315</b>   | 0.004    | <b>-0.464</b> | <0.001   | <b>-0.755</b>         | <0.001   | <b>-0.465</b>   | <0.001   | <b>-0.790</b> | <0.001   |
| Uric acid (mmol/L)   | <b>-0.438</b>         | <0.001   | <b>-0.276</b>   | 0.013    | <b>-0.483</b> | <0.001   | <b>-0.818</b>         | <0.001   | <b>-0.414</b>   | <0.001   | <b>-0.822</b> | <0.001   |
| Creatinine (mmol/L)  | <b>-0.438</b>         | <0.001   | <b>-0.443</b>   | <0.001   | <b>-0.562</b> | <0.001   | <b>-0.798</b>         | <0.001   | <b>-0.505</b>   | <0.001   | <b>-0.839</b> | <0.001   |
| <b>FMU</b>           | <i>r</i>              | <i>p</i> | <i>r</i>        | <i>p</i> | <i>r</i>      | <i>p</i> | <i>r</i>              | <i>p</i> | <i>r</i>        | <i>p</i> | <i>r</i>      | <i>p</i> |
| Osmolality (mOsm/kg) | <b>-0.500</b>         | <0.001   | -0.196          | 0.081    | <b>-0.470</b> | <0.001   | <b>-0.715</b>         | <0.001   | <b>-0.230</b>   | 0.045    | <b>-0.672</b> | <0.001   |
| USG                  | <b>-0.349</b>         | 0.002    | -0.187          | 0.097    | <b>-0.350</b> | 0.001    | <b>-0.542</b>         | <0.001   | -0.156          | 0.179    | <b>-0.531</b> | <0.001   |
| pH                   | 0.092                 | 0.419    | 0.147           | 0.301    | 0.122         | 0.282    | <b>-0.227</b>         | 0.049    | -0.196          | 0.091    | <b>-0.239</b> | 0.038    |
| Potassium (mmol/L)   | <b>-0.309</b>         | 0.005    | -0.041          | 0.720    | <b>-0.256</b> | 0.022    | <b>-0.548</b>         | <0.001   | -0.109          | 0.348    | <b>-0.504</b> | <0.001   |
| Sodium (mmol/L)      | <b>-0.275</b>         | 0.014    | 0.129           | 0.253    | <b>-0.155</b> | 0.169    | <b>-0.724</b>         | <0.001   | -0.163          | 0.160    | <b>-0.673</b> | <0.001   |
| Chloride (mmol/L)    | <b>-0.309</b>         | 0.005    | <b>0.149</b>    | 0.188    | <b>-0.173</b> | 0.125    | <b>-0.690</b>         | <0.001   | -0.079          | 0.500    | <b>-0.621</b> | <0.001   |
| Calcium (mmol/L)     | -0.218                | 0.052    | -0.162          | 0.151    | -0.238        | 0.033    | <b>-0.364</b>         | <0.001   | <b>-0.237</b>   | 0.039    | <b>-0.371</b> | <0.001   |
| Phosphorus (mmol/L)  | <b>-0.251</b>         | 0.025    | <b>-0.404</b>   | <0.001   | <b>-0.370</b> | 0.001    | <b>-0.518</b>         | <0.001   | <b>-0.244</b>   | 0.034    | <b>-0.508</b> | <0.001   |

|                     |               |       |               |       |               |        |               |        |               |       |               |        |
|---------------------|---------------|-------|---------------|-------|---------------|--------|---------------|--------|---------------|-------|---------------|--------|
| Magnesium (mmol/L)  | <b>-0.158</b> | 0.162 | -0.169        | 0.135 | <b>-0.195</b> | 0.083  | <b>-0.508</b> | <0.001 | <b>-0.293</b> | 0.010 | <b>-0.553</b> | <0.001 |
| Urea (mmol/L)       | <b>-0.373</b> | 0.001 | <b>-0.322</b> | 0.004 | <b>-0.428</b> | <0.001 | <b>-0.692</b> | <0.001 | <b>-0.272</b> | 0.017 | <b>-0.659</b> | <0.001 |
| Uric acid (mmol/L)  | <b>-0.355</b> | 0.001 | <b>-0.220</b> | 0.050 | <b>-0.369</b> | 0.001  | <b>-0.695</b> | <0.001 | <b>-0.268</b> | 0.019 | <b>-0.677</b> | <0.001 |
| Creatinine (mmol/L) | <b>-0.295</b> | 0.008 | <b>-0.379</b> | 0.001 | <b>-0.392</b> | <0.001 | <b>-0.530</b> | <0.001 | -0.167        | 0.149 | <b>-0.503</b> | <0.001 |

**Supplementary Table 4** Correlations between fluids intake and plasma biomarkers of young adults

| Plasma biomarkers    | Total drinking fluids |          | Water from food |          | TWI      |          |
|----------------------|-----------------------|----------|-----------------|----------|----------|----------|
|                      | <i>r</i>              | <i>p</i> | <i>r</i>        | <i>p</i> | <i>r</i> | <i>p</i> |
| Males                |                       |          |                 |          |          |          |
| Osmolality (mOsm/kg) | -0.037                | 0.742    | -0.008          | 0.947    | -0.014   | 0.904    |
| Potassium (mmol/L)   | 0.078                 | 0.494    | -0.018          | 0.876    | 0.028    | 0.804    |
| Sodium (mmol/L)      | -0.051                | 0.656    | -0.093          | 0.412    | -0.093   | 0.411    |
| Chloride (mmol/L)    | 0.123                 | 0.279    | 0.058           | 0.612    | 0.136    | 0.229    |
| Calcium (mmol/L)     | 0.105                 | 0.353    | 0.037           | 0.745    | 0.106    | 0.349    |
| Phosphorus (mmol/L)  | -0.122                | 0.281    | <b>-0.236</b>   | 0.035    | -0.178   | 0.113    |
| Magnesium (mmol/L)   | 0.153                 | 0.175    | <b>-0.240</b>   | 0.032    | -0.006   | 0.960    |
| Females              |                       |          |                 |          |          |          |
| Osmolality (mOsm/kg) | 0.033                 | 0.779    | 0.060           | 0.604    | 0.076    | 0.513    |
| Potassium (mmol/L)   | 0.027                 | 0.817    | 0.054           | 0.644    | 0.048    | 0.680    |
| Sodium (mmol/L)      | 0.162                 | 0.163    | 0.074           | 0.526    | 0.171    | 0.139    |
| Chloride (mmol/L)    | -0.064                | 0.584    | 0.184           | 0.111    | -0.009   | 0.941    |
| Calcium (mmol/L)     | 0.078                 | 0.506    | <b>-0.237</b>   | 0.039    | 0.009    | 0.936    |
| Phosphorus (mmol/L)  | 0.190                 | 0.100    | -0.094          | 0.421    | 0.127    | 0.274    |
| Magnesium (mmol/L)   | 0.154                 | 0.183    | -0.207          | 0.072    | 0.056    | 0.634    |
